# Supplementary material for: Antineutrophil Cytoplasmic Antibody-associated Vasculitis and the Risk of Developing Incidental Tuberculosis: A Population-based Cohort Study
Source: Preprints.org preprint supplement (doi:10.20944/preprints202310.0861.v1), 2023-10-13
Supplement: Supplementary file 1 [file supplementary]

**Supplementary Table 1. Annual AAV incidence rate during study period.**

| **Year** | **AAV**  **No. of events** | **Total Population person years** | **Annual Incidence Rate per 100,000 person years** |
| --- | --- | --- | --- |
| 2000 | 336 | 937,649 | 35.83 |
| 2001 | 236 | 937,480 | 25.17 |
| 2002 | 226 | 926,038 | 24.41 |
| 2003 | 194 | 916,788 | 21.16 |
| 2004 | 215 | 909,605 | 23.64 |
| 2005 | 182 | 903,243 | 20.15 |
| 2006 | 195 | 897,042 | 21.74 |
| 2007 | 168 | 890,675 | 18.86 |
| 2008 | 143 | 884,089 | 16.17 |
| 2009 | 130 | 877,402 | 14.82 |
| 2010 | 121 | 870,735 | 13.90 |
| 2011 | 154 | 863,587 | 17.83 |
| 2012 | 119 | 855,691 | 13.91 |
